# Supplementary material for: Increasing the Efficiency of Canola and Soybean GMO Detection and Quantification Using Multiplex Droplet Digital PCR
Source: MDPI journal article supplement (doi:10.3390/biology11020201), 2022-01-27
Supplement: s1 [file s1]

## **SUPPLEMENTARY MATERIALS**

### **Increasing Efficiency of Canola and Soybean GMO Detection and Quantification with Multiplex Droplet Digital PCR**

Tigst Demeke, Sung-Jong Lee and Monika Eng

Grain Research Laboratory, Canadian Grain Commission, Winnipeg, MB, R3C 3G8

**Example of DNA mix preparation:**

TETRAPLEX SAMPLE PREPARATION: Solutions of 20 ng/ $\mu$ L concentration were prepared for non-GM DNA and each GM event at 100%. These solutions were used to prepare the GM DNA mix as described below.

5% GM mix: 25  $\mu$ L of each of the four GM solution at 100% was added to 400  $\mu$ L non-GM DNA = 500  $\mu$ L of tetraplex mix containing 5% of each GM event.

1% GM mix: 80  $\mu$ L of the 5% GM mix (described above) was added to 320  $\mu$ L of non-GM DNA = 400  $\mu$ L of tetraplex containing 1% of each GM event.

0.1% GM mix: 35  $\mu$ L of the 1% GM mix (described above) was added to 315  $\mu$ L of non-GM DNA = 350  $\mu$ L of tetraplex containing 0.1% of each GM event.

\*\*\*duplex and triplex GM DNA mixes were prepared in the same manner using two and three GM events respectively

**Supplementary Table S1.** Primer and probe concentrations and probe labels used for duplex ddPCR assays

| Crop    | Duplex events<br>( $\mu\text{M}$ ) | Event    | Primer and probe concentrations and labels |                              |                            |       |
|---------|------------------------------------|----------|--------------------------------------------|------------------------------|----------------------------|-------|
|         |                                    |          | Forward                                    | Reverse<br>( $\mu\text{M}$ ) | Probe<br>( $\mu\text{M}$ ) | Label |
| Canola  | HCN92 & GT73                       | HCN92    | 0.4                                        | 0.4                          | FAM                        | 0.2   |
|         |                                    | GT73     | 0.4                                        | 0.4                          | HEX                        | 0.2   |
|         | HCN92 & MON88302                   | HCN92    | 0.4                                        | 0.4                          | FAM                        | 0.2   |
|         |                                    | MON88302 | 0.4                                        | 0.4                          | HEX                        | 0.2   |
|         | GT73 & MON88302                    | GT73     | 0.4                                        | 0.4                          | FAM                        | 0.2   |
|         |                                    | MON88302 | 0.4                                        | 0.4                          | HEX                        | 0.2   |
|         | Reference gene                     | FatA(A)  | 0.3                                        | 0.9                          | HEX                        | 0.15  |
|         |                                    |          |                                            |                              |                            |       |
| Soybean | A2704 & DP305423                   | A2704    | 0.4                                        | 0.4                          | FAM                        | 0.2   |
|         |                                    | DP305423 | 0.8                                        | 0.5                          | HEX                        | 0.1   |
|         | A2704 & MON89788                   | A2704    | 0.4                                        | 0.4                          | FAM                        | 0.2   |
|         |                                    | MON89788 | 0.4                                        | 0.4                          | HEX                        | 0.2   |
|         | DP305423 & MON89788                | DP305423 | 0.8                                        | 0.5                          | FAM                        | 0.1   |
|         |                                    | MON89788 | 0.4                                        | 0.4                          | HEX                        | 0.2   |
|         | A2704 & DAS81419                   | A2704    | 0.4                                        | 0.4                          | HEX                        | 0.2   |
|         |                                    | DAS81419 | 0.4                                        | 0.4                          | FAM                        | 0.2   |
|         | Reference gene                     | Lectin   | 0.4                                        | 0.4                          | FAM                        | 0.2   |
|         |                                    |          |                                            |                              |                            |       |

**Supplementary Table S2.** Primer and probe concentrations and probe labels used for triplex ddPCR assays

| Crop    | Triplex events                | Event    | Primer and probe information |            |         |            |
|---------|-------------------------------|----------|------------------------------|------------|---------|------------|
|         |                               |          | Forward                      | Reverse    | Probe   |            |
|         |                               |          | ( $\mu$ M)                   | ( $\mu$ M) | Label   | ( $\mu$ M) |
| Canola  | HCN92, GT73<br>& MON88302     | HCN92    | 0.4                          | 0.4        | FAM     | 0.4        |
|         |                               | GT73     | 0.4                          | 0.4        | HEX     | 0.1        |
|         |                               | MON88302 | 0.4                          | 0.4        | FAM/HEX | 0.12       |
| Canola  | OXY235, GT73<br>& MON88302    | OXY235   | 0.4                          | 0.4        | FAM     | 0.17       |
|         |                               | GT73     | 0.4                          | 0.4        | HEX     | 0.17       |
|         |                               | MON88302 | 0.4                          | 0.4        | FAM/HEX | 0.13       |
| Canola  | Reference gene                | FatA(A)  | 0.3                          | 0.9        | FAM     | 0.15       |
| Soybean | A2704, MON89788<br>& DP305423 | A2704    | 0.4                          | 0.4        | FAM     | 0.17       |
|         |                               | MON89788 | 0.4                          | 0.4        | HEX     | 0.13       |
|         |                               | DP305423 | 0.8                          | 0.5        | FAM/HEX | 0.2        |
| Soybean | MON89788, A2704<br>& DAS81419 | MON89788 | 0.4                          | 0.4        | FAM     | 0.2        |
|         |                               | A2704    | 0.4                          | 0.4        | HEX     | 0.2        |
|         |                               | DAS81419 | 0.4                          | 0.4        | FAM/HEX | 0.13       |
| Soybean | Reference gene                | Lectin   | 0.4                          | 0.4        | FAM     | 0.2        |

For the triplex ddPCR, MON88302 and DP305423 events were analyzed using a mixture of equal amounts of FAM and HEX labelled probes. Final concentration is the total amount of probe used.

**Supplementary Table S3.** Primer and probe concentrations and probe labels used for tetraplex ddPCR assays

| Crop    | Tetraplex events | Event    | Primer and probe information |            |       |            |
|---------|------------------|----------|------------------------------|------------|-------|------------|
|         |                  |          | Forward                      | Reverse    | Probe |            |
|         |                  |          | ( $\mu$ M)                   | ( $\mu$ M) | Label | ( $\mu$ M) |
| Canola  | HCN92, GT73,     | HCN92    | 0.4                          | 0.4        | FAM   | 0.27       |
|         | MON88302, OXY235 | GT73     | 0.4                          | 0.4        | HEX   | 0.30       |
|         |                  | MON88302 | 0.4                          | 0.4        | FAM   | 0.30       |
|         |                  | OXY235   | 0.4                          | 0.4        | HEX   | 0.17       |
|         | Reference gene   | FatA(A)  | 0.3                          | 0.9        | HEX   | 0.15       |
| Soybean | A2704, DP305423, | A2704    | 0.4                          | 0.4        | FAM   | 0.23       |
|         | MON89788 &       | DP305423 | 0.8                          | 0.5        | HEX   | 0.17       |
|         | DAS81419         | MON89788 | 0.4                          | 0.4        | FAM   | 0.10       |
|         |                  | DAS81419 | 0.4                          | 0.4        | HEX   | 0.27       |
|         | Reference gene   | Lectin   | 0.4                          | 0.4        | FAM   | 0.20       |
